# Supplementary material for: BMP and FGF signaling interact to pattern mesoderm by controlling basic helix-loop-helix transcription factor activity
Source: eLife journal article supplement (doi:10.7554/elife.31018), 2018-06-06
Supplement: supp [file elife-31018-supp-v1.zip]

Archive with 18 entries (18 files):
- elife_poa_e31018_Figure_3_figure_supplement_1.pdf
- elife_poa_e31018_Figure_1_video_6.mov
- elife_poa_e31018_Figure_8_figure_supplement_1.pdf
- elife_poa_e31018_Transparent_Reporting_Form.pdf
- elife_poa_e31018_Figure_7_figure_supplement_1.pdf
- elife_poa_e31018_Figure_2_source_data_1.zip
- elife_poa_e31018_Figure_4_figure_supplement_1.pdf
- elife_poa_e31018_Figure_5_source_data_1.zip
- elife_poa_e31018_Figure_1_video_4.mov
- elife_poa_e31018_Figure_1_video_3.mov
- elife_poa_e31018_Figure_6_source_data_1.zip
- elife_poa_e31018_Figure_1_video_2.mov
- elife_poa_e31018_Figure_7_video_1.mov
- elife_poa_e31018_Figure_1_video_5.mov
- elife_poa_e31018_Figure_1_video_1.mov
- elife_poa_e31018_Figure_3_figure_supplement_2.pdf
- elife_poa_e31018_Figure_7_figure_supplement_2.pdf
- elife_poa_e31018_Figure_1_figure_supplement_1.pdf
