# Supplementary figures and images for: BMP and FGF signaling interact to pattern mesoderm by controlling basic helix-loop-helix transcription factor activity
Source: eLife journal article supplement (doi:10.7554/elife.31018), 2018-06-06

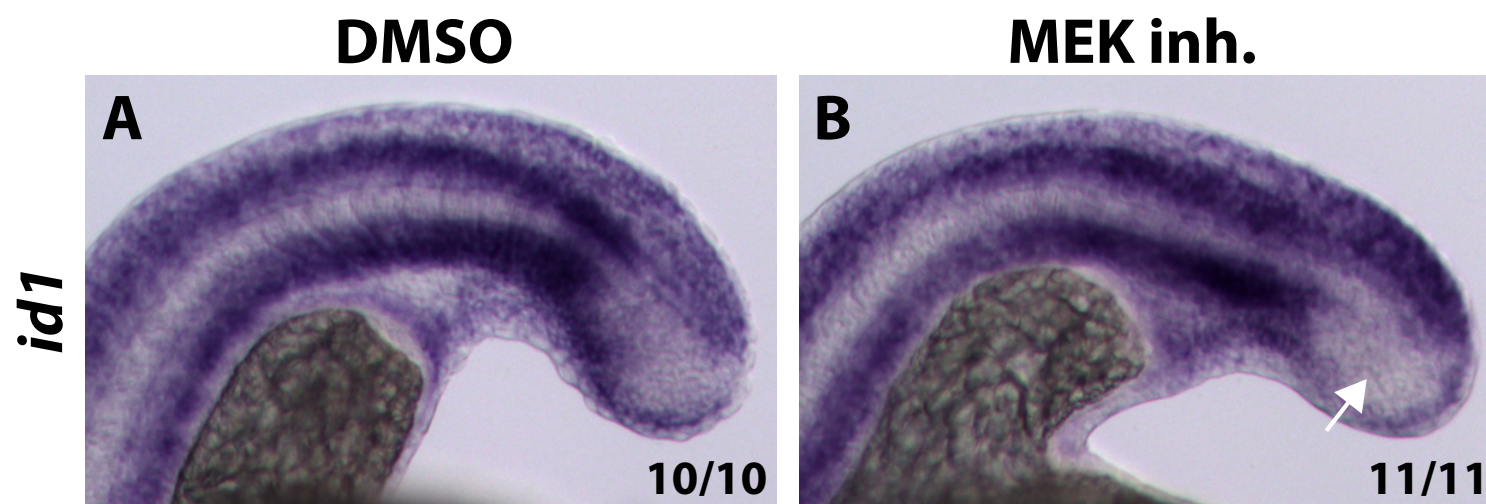

**Supplemental Figure 2**

Supplement: supp [file elife-31018-supp-v1.zip › elife_poa_e31018_Figure_3_figure_supplement_1.pdf]

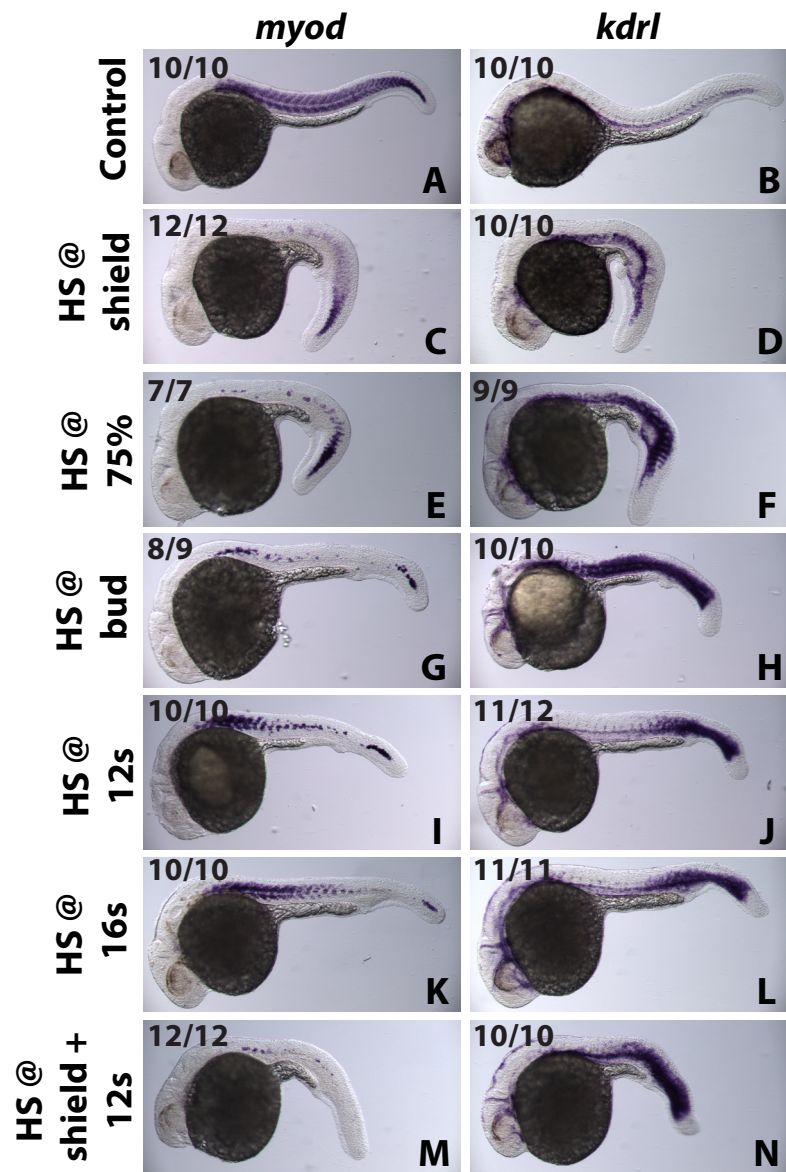

Supplemental Figure 7

Supplement: supp [file elife-31018-supp-v1.zip › elife_poa_e31018_Figure_8_figure_supplement_1.pdf]

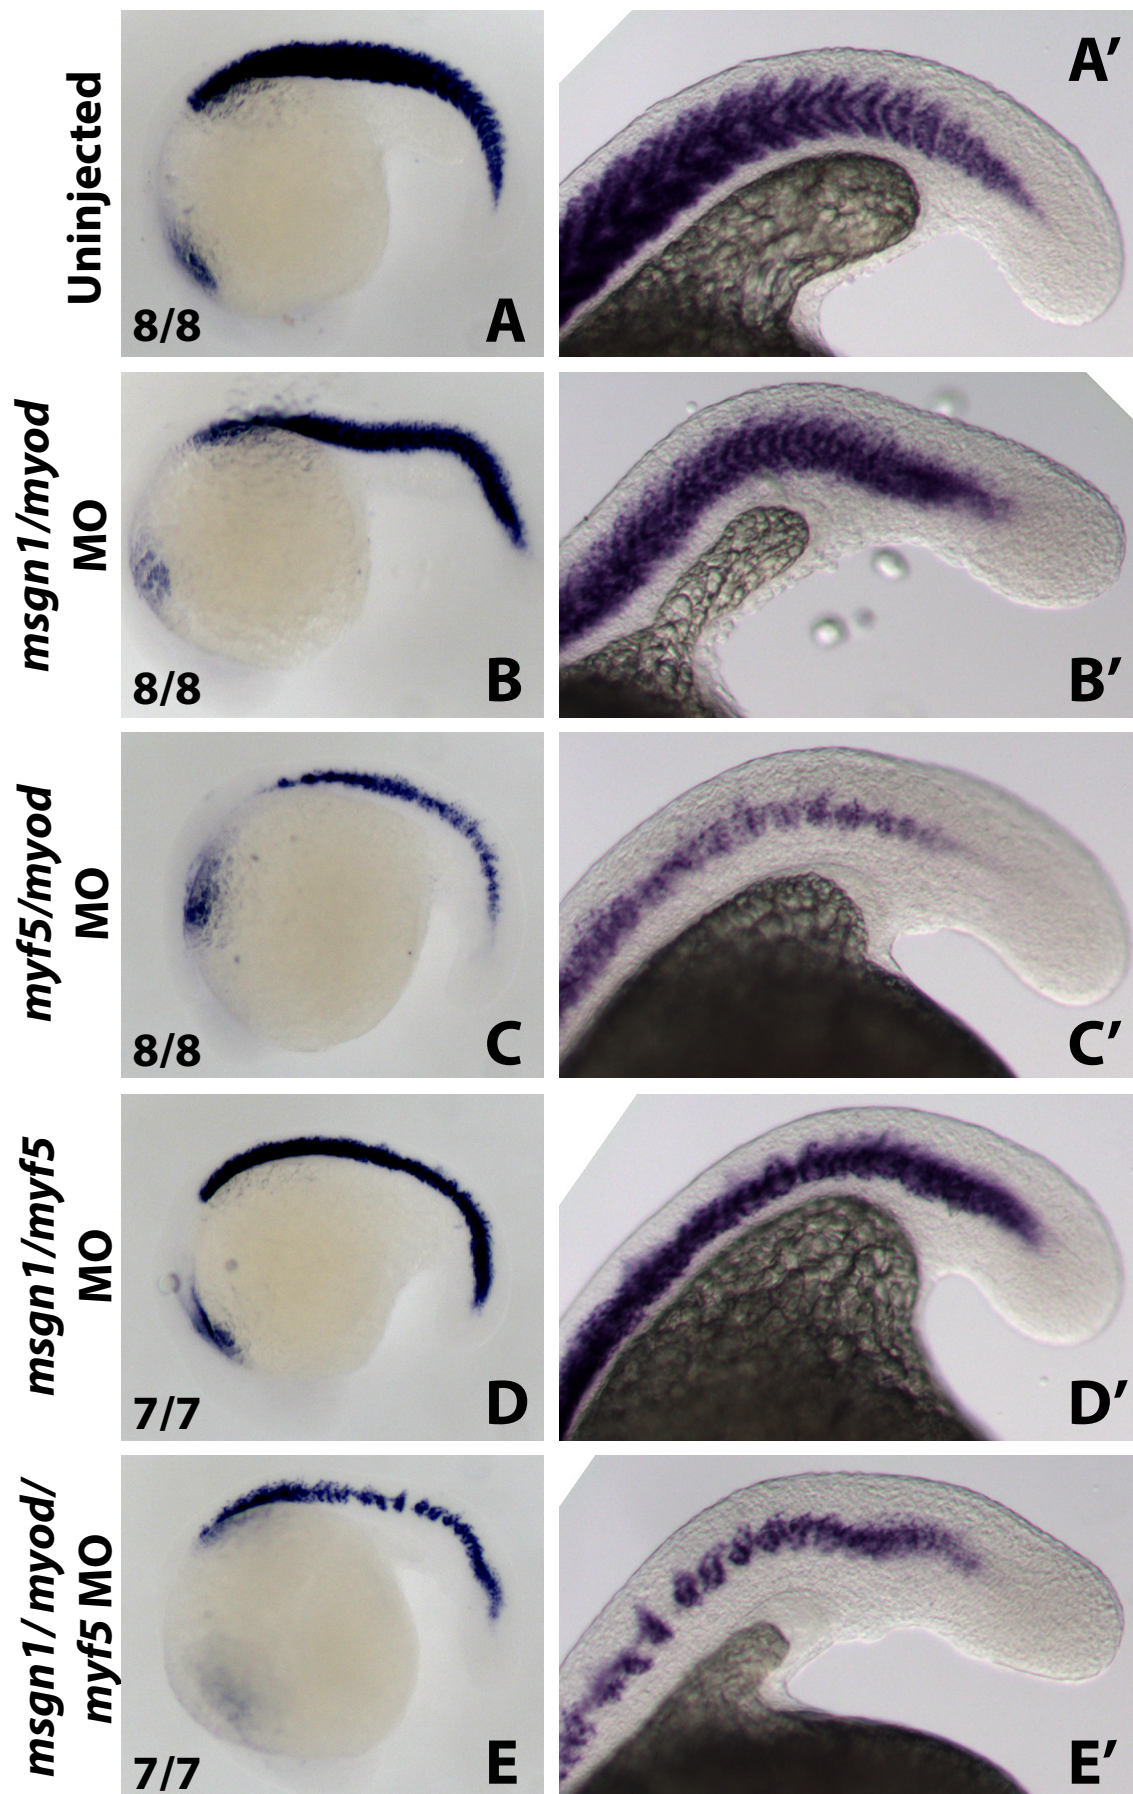

Supplemental Figure 5

Supplement: supp [file elife-31018-supp-v1.zip › elife_poa_e31018_Figure_7_figure_supplement_1.pdf]

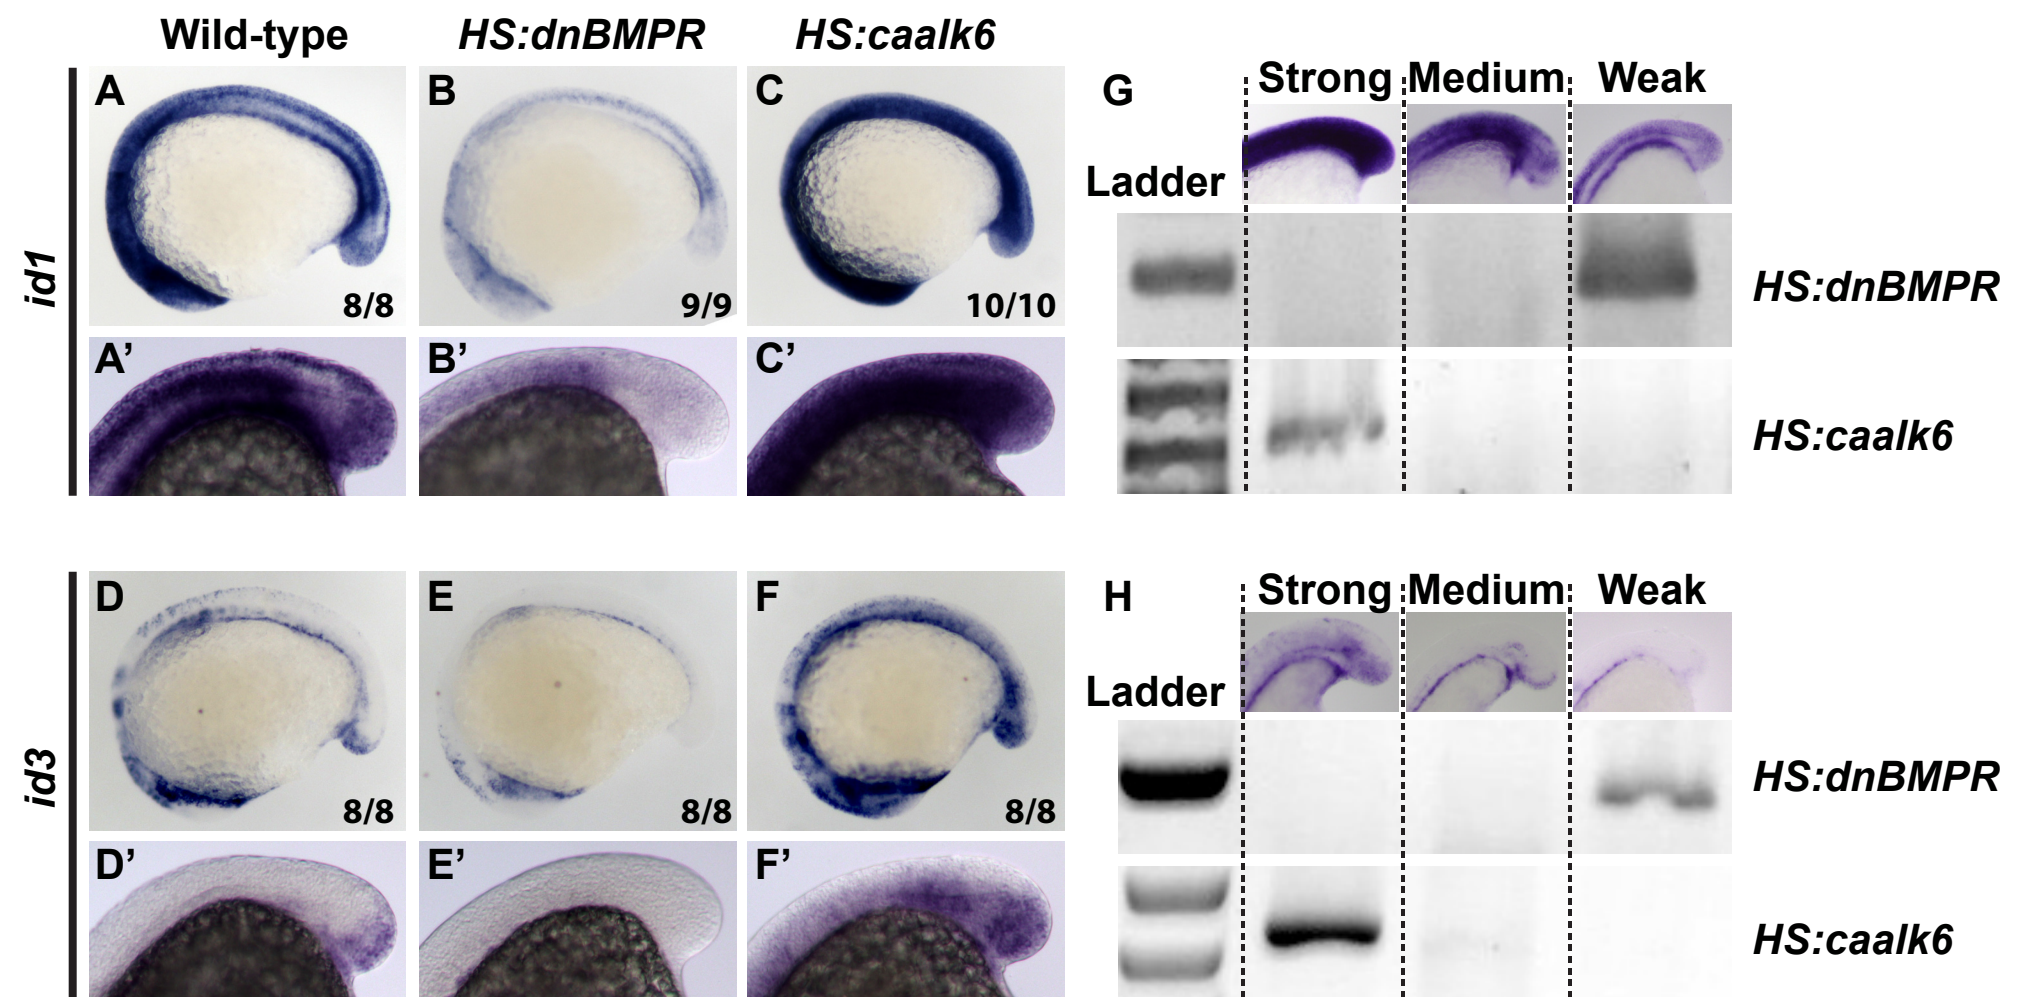

Supplemental Figure 4

Supplement: supp [file elife-31018-supp-v1.zip › elife_poa_e31018_Figure_4_figure_supplement_1.pdf]

pSMAD 1/5/8

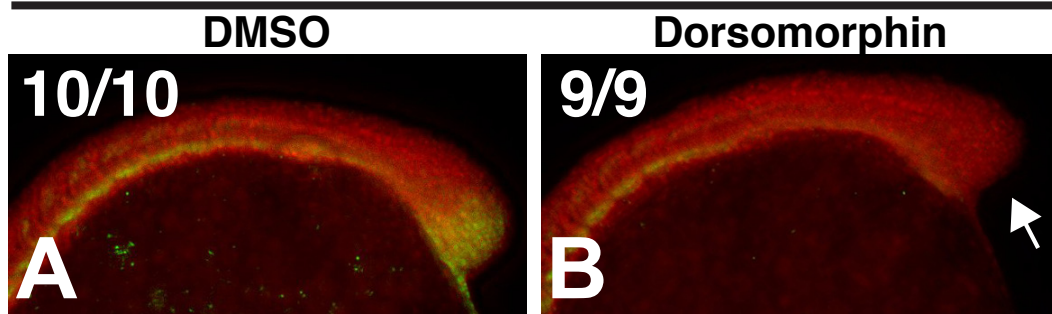

*etv2*

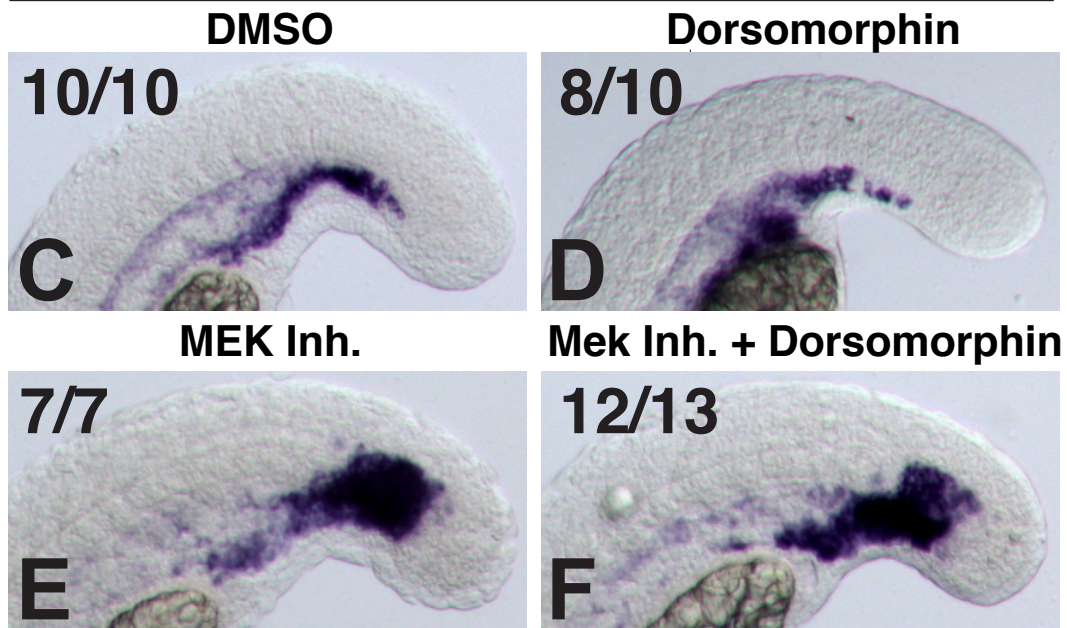

Supplemental Figure 3

Supplement: supp [file elife-31018-supp-v1.zip › elife_poa_e31018_Figure_3_figure_supplement_2.pdf]

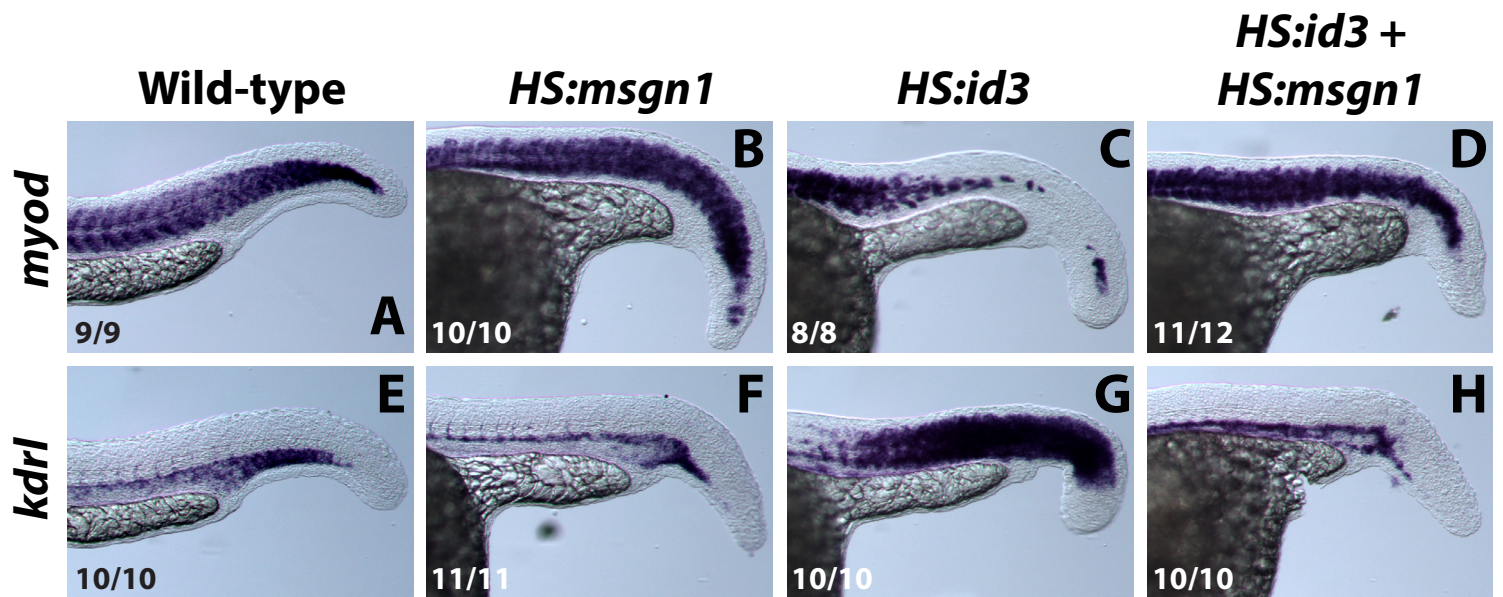

**Supplemental Figure 6**

Supplement: supp [file elife-31018-supp-v1.zip › elife_poa_e31018_Figure_7_figure_supplement_2.pdf]

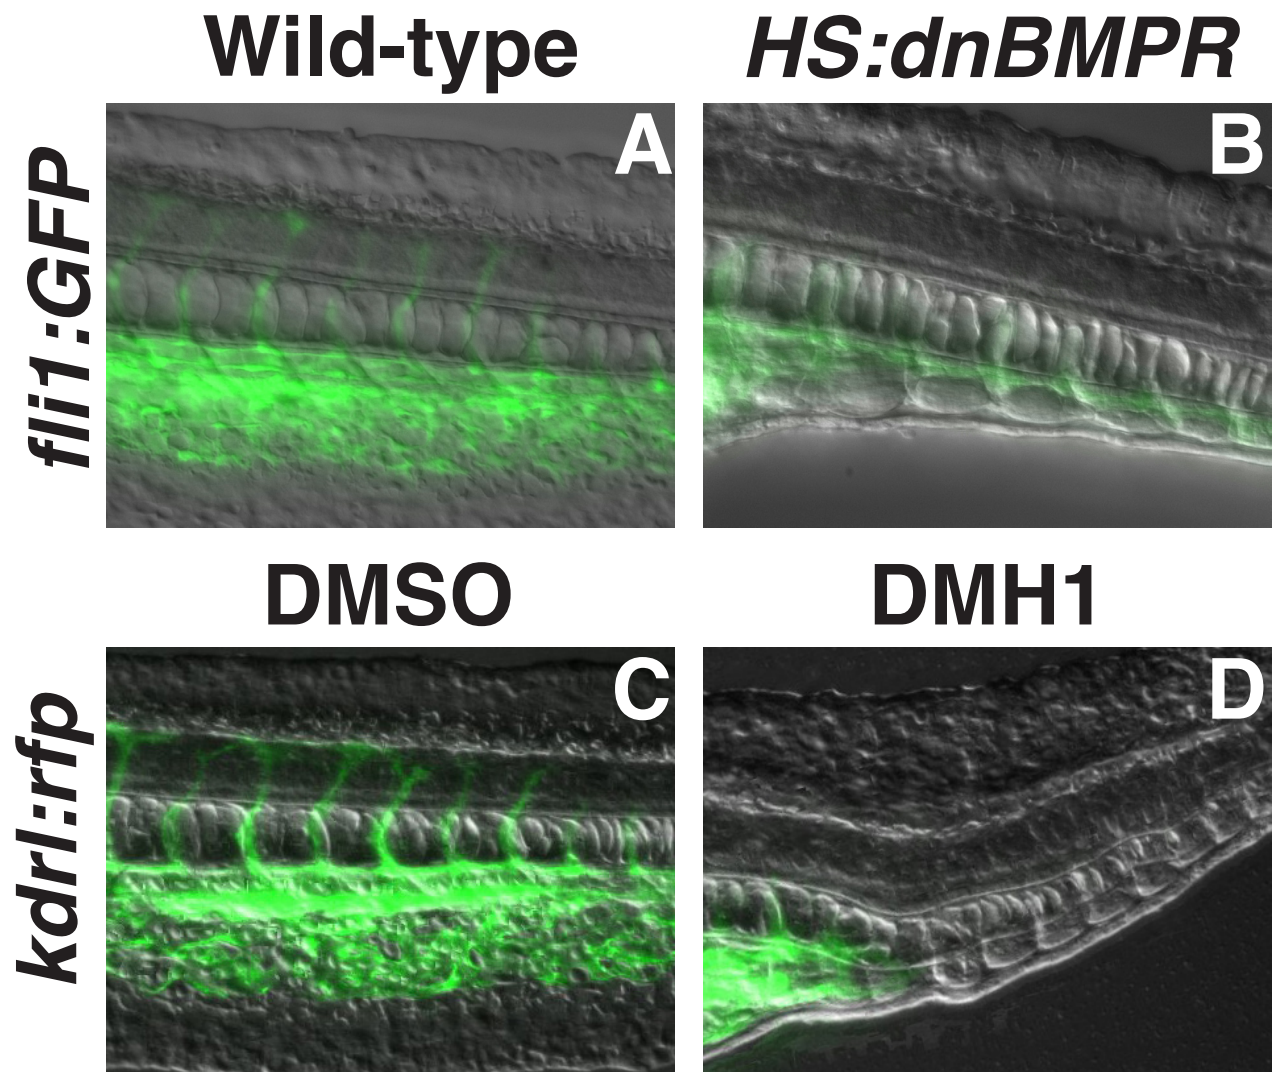

Supplemental Figure 1

Supplement: supp [file elife-31018-supp-v1.zip › elife_poa_e31018_Figure_1_figure_supplement_1.pdf]
